# Supplementary material for: Prenatal paternal anxiety symptoms predict child DHEA levels and internalizing symptoms during adrenarche
Source: PubMed Central journal article supplement (PMC10794355; doi:10.3389/fnbeh.2023.1217846), 2024-01-04
Supplement: Data_Sheet_1.pdf [file Data_Sheet_1.pdf]

## *Supplementary Material*

### **Prenatal Paternal Anxiety Symptoms Predict Child DHEA levels and Internalizing Symptoms during Adrenarche**

**Sherri Lee Jones<sup>\*</sup>, Victoria De Braga, Christina Caccese, Jimin Lew, Guillaume Elgbeili, Natalie Castellanos-Ryan, Sophie Parent, Gina Muckle, Catherine M. Herba, William D. Fraser, Simon Ducharme, Julia Barnwell, Jacquetta Trasler, Jean R. Séguin, Tuong-Vi Nguyen, Tina Montreuil**

**\* Correspondence:** Sherri Lee JONES, PhD [sherri.jones@affiliate.mcgill.ca](mailto:sherri.jones@affiliate.mcgill.ca)

#### **1.1 Supplementary Figures**

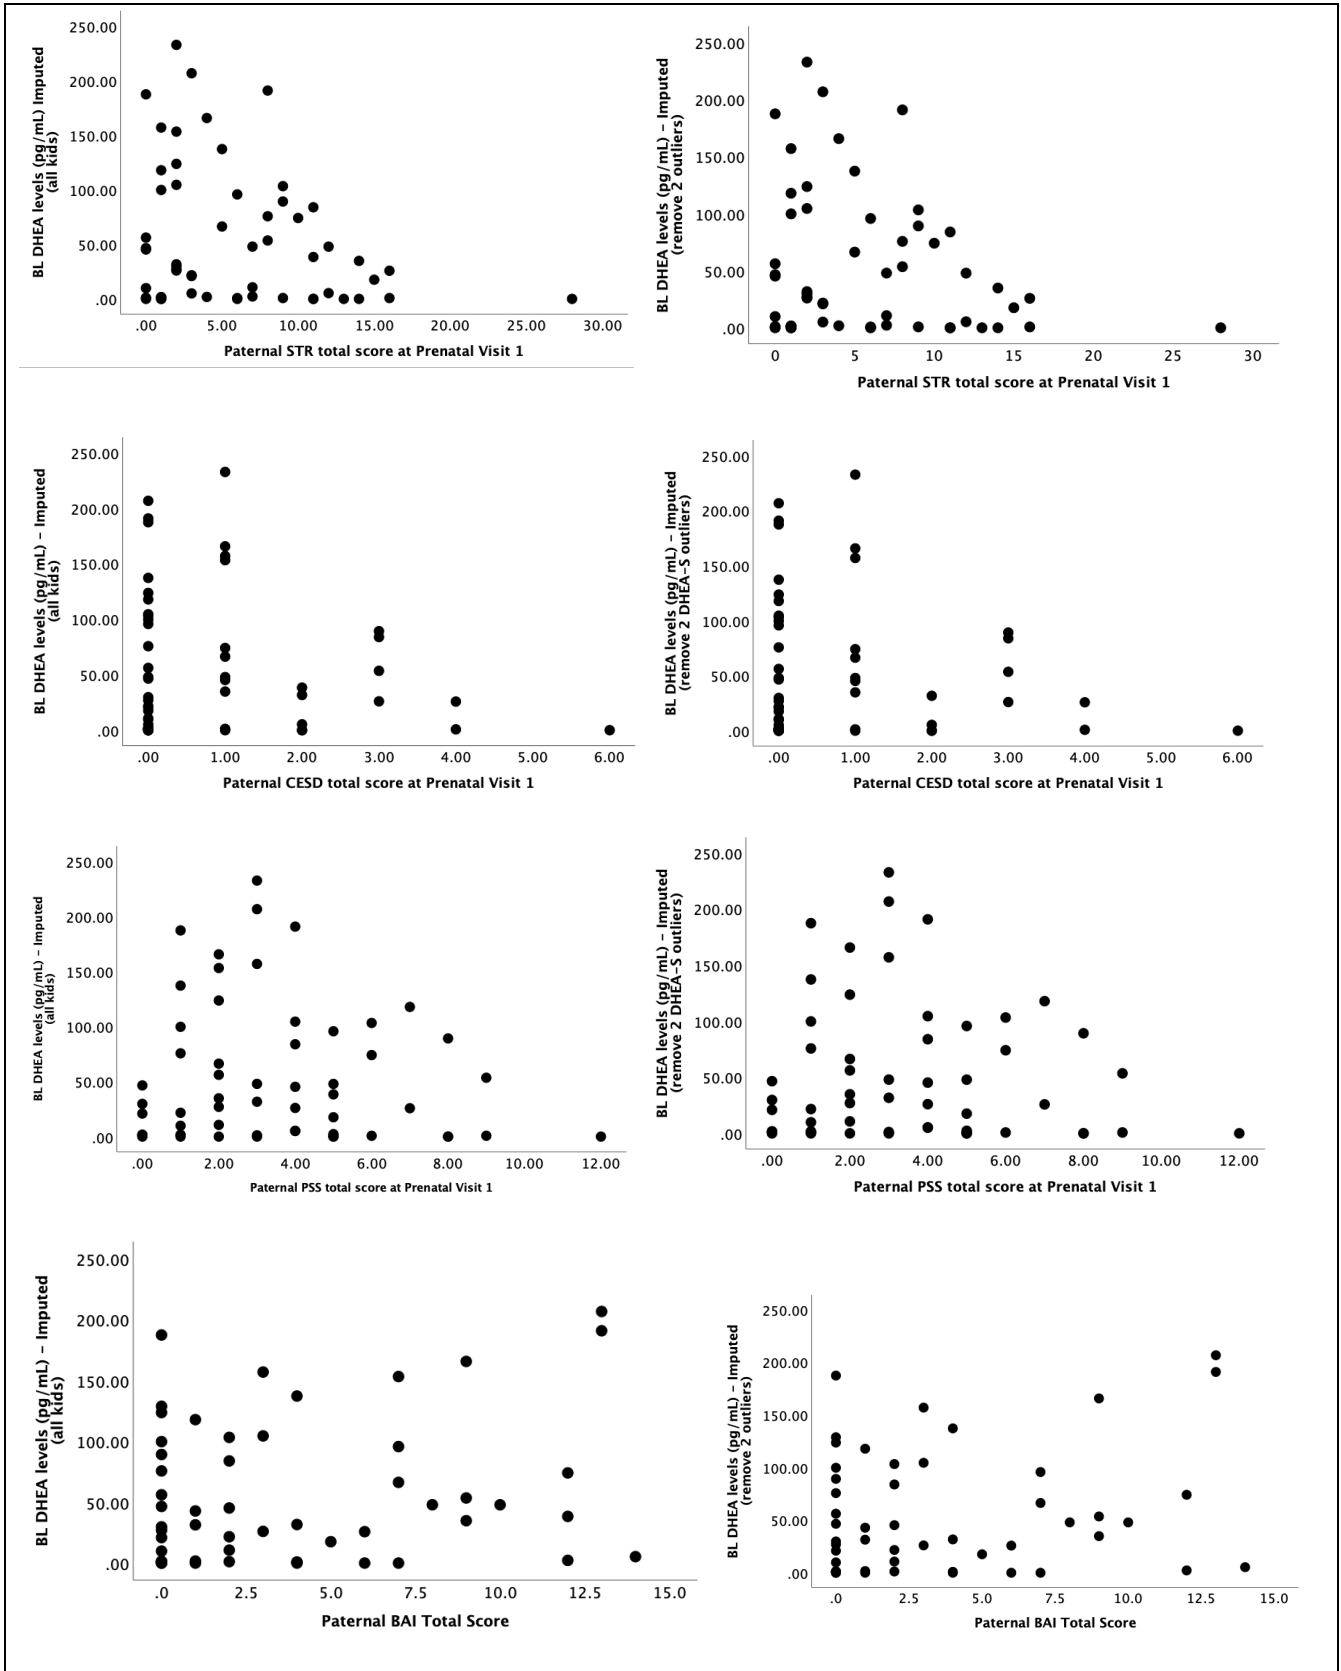

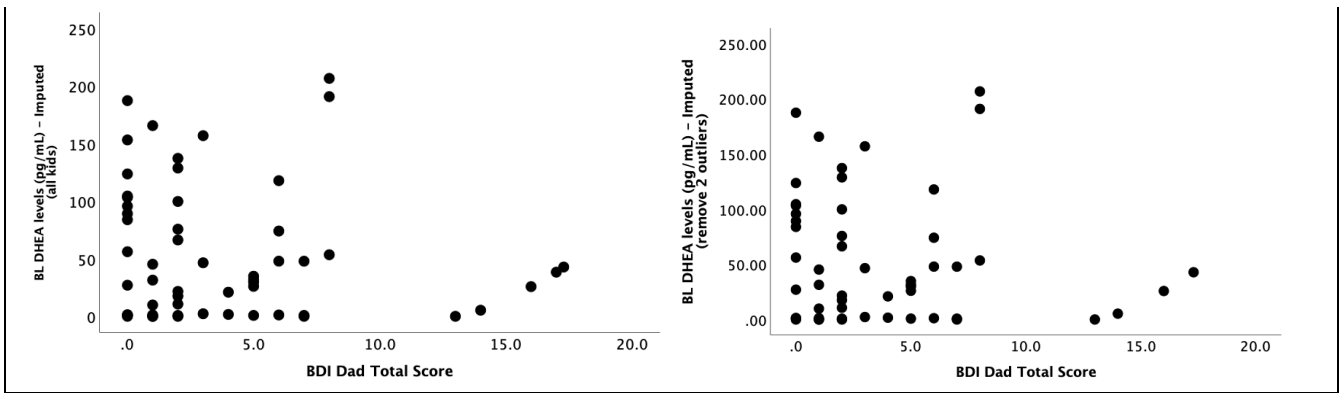

**Supplementary Figure 1. Scatterplots showing bivariate correlations between child DHEA (dehydroepiandrosterone) levels at ages 6-8 and paternal mental health measures at the prenatal (STR, CES-D, PSS) or concurrent childhood (BAI, BDI) assessment. Correlations including the full sample (left panels) and after excluding the two DHEA-S outliers (right panels) are shown. CES-D, Center for Epidemiological Studies Depression Scale; PSS, Perceived Stress Scale; STR, Anxiety Scale; BAI: Beck Anxiety Inventory; BDI: Beck Depression Inventory.**

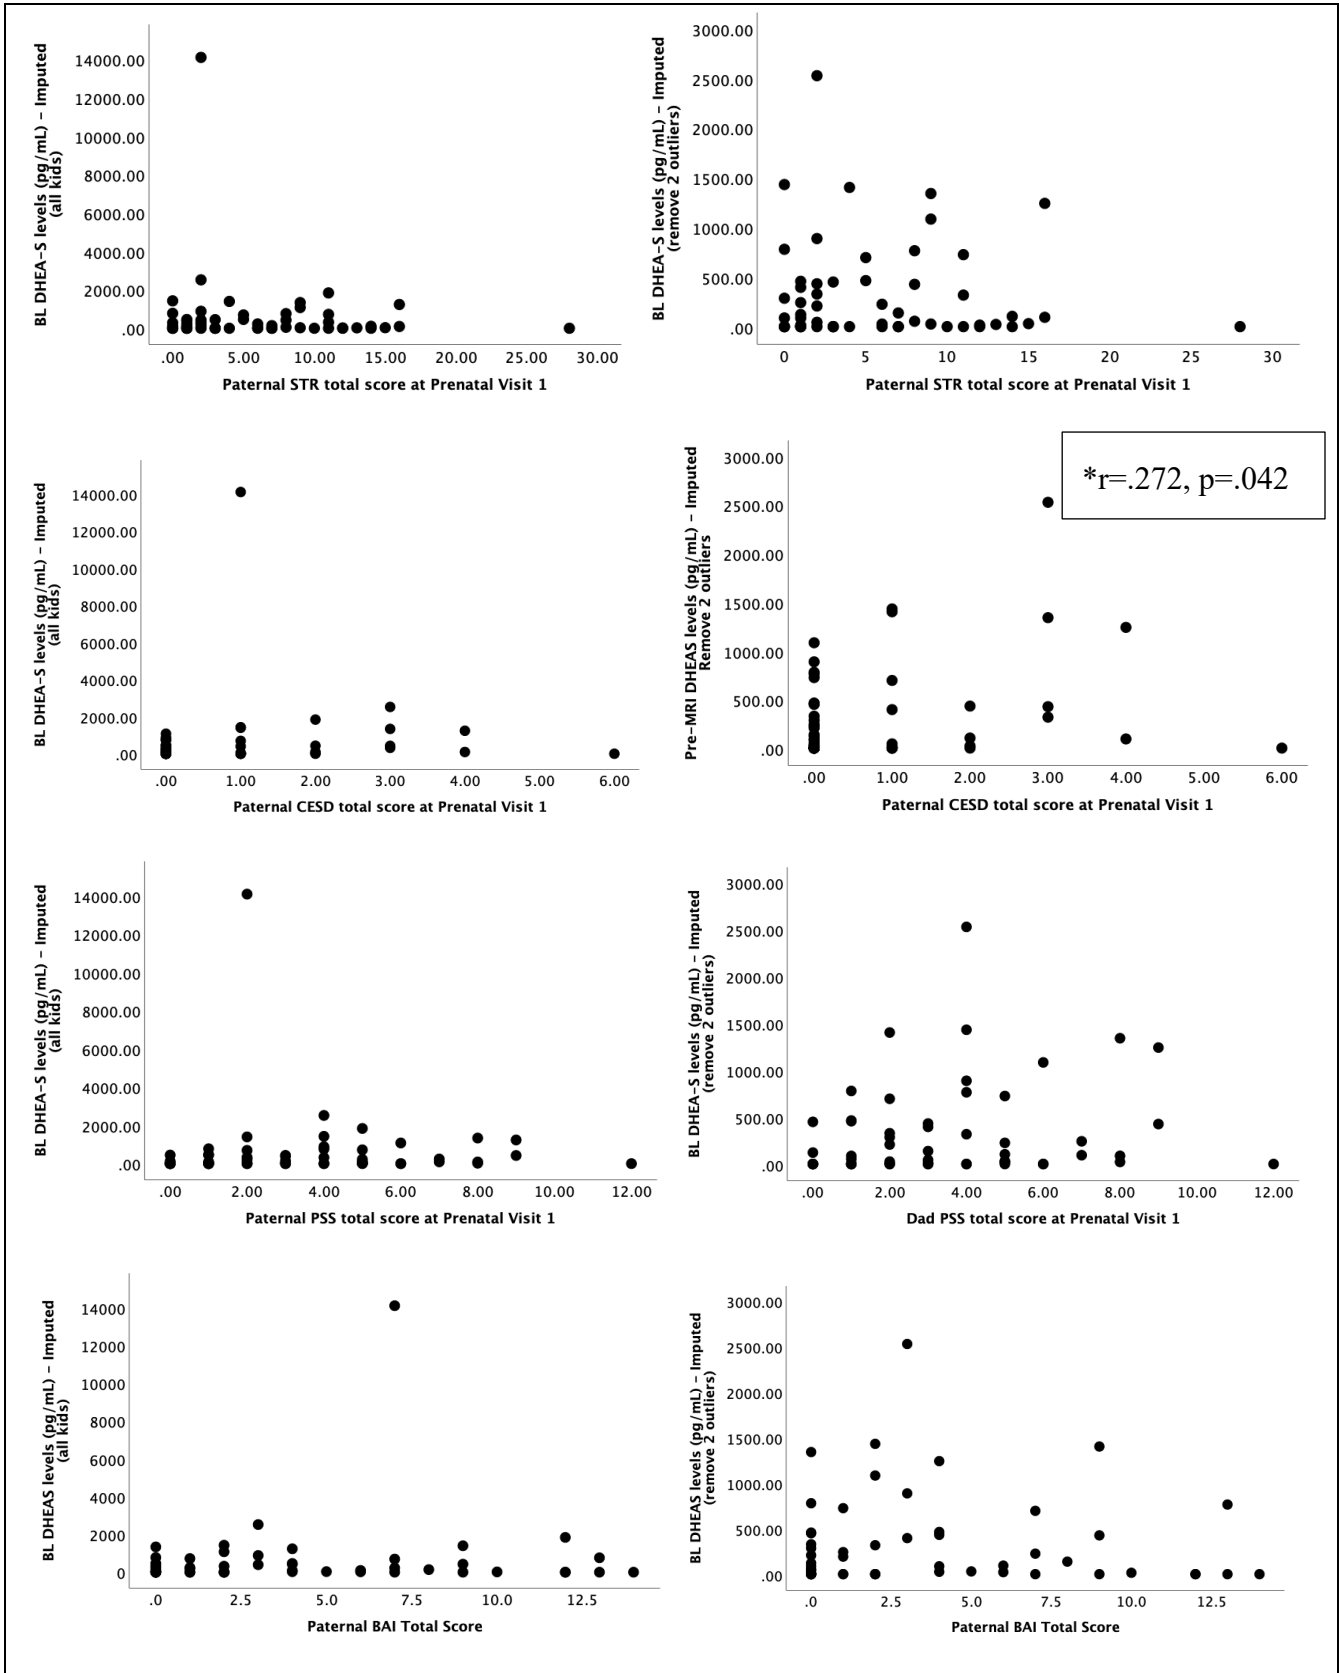

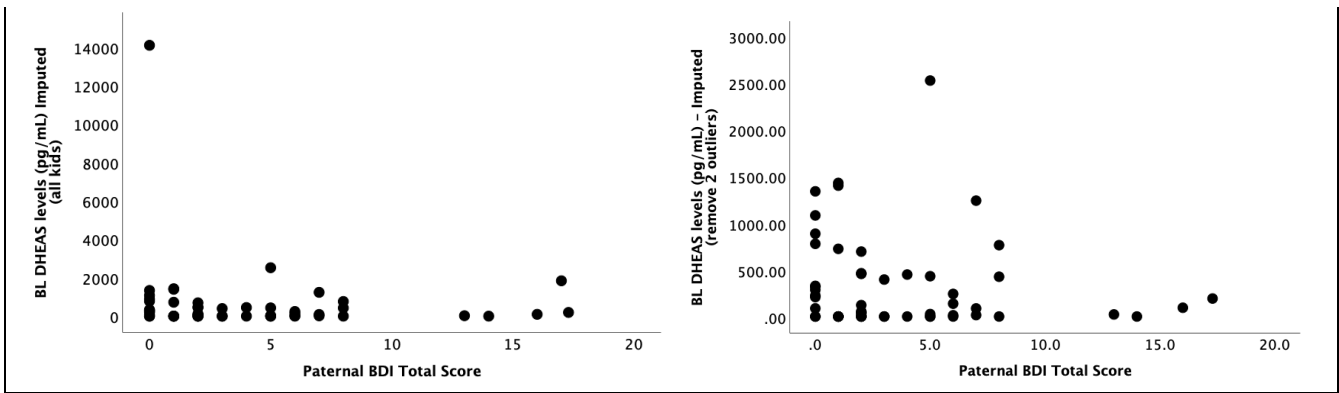

**Supplementary Figure 2. Scatterplots showing bivariate correlations between child DHEA-S (dehydroepiandrosterone-sulfate) levels at ages 6-8 and paternal mental health measures at the prenatal (STR, CES-D, PSS) or concurrent childhood (BAI, BDI) assessment.** Correlations including the full sample (left panels) and after excluding the two DHEA-S outliers (right panels) are shown. CES-D, Center for Epidemiological Studies Depression Scale; PSS, Perceived Stress Scale; STR, Anxiety Scale; BAI: Beck Anxiety Inventory; BDI: Beck Depression Inventory. \* $p < .05$ .
